# Supplementary material for: Glycine Betaine-Mediated Root Priming Improves Water Stress Tolerance in Wheat (Triticum aestivum L.)
Source: MDPI journal article supplement (doi:10.3390/agriculture11111127), 2021-11-11
Supplement: s1 [file s1]

**Supplementary Table S1: Sequences of primers used in this study**

| <b>Gene name</b>  | <b>Primer</b> | <b>Sequence (5'-3')</b> |
|-------------------|---------------|-------------------------|
| <i>Actin</i>      | F             | GACCCAGACAACTCGCAACT    |
|                   | R             | CTCGCATATGTGGCTCTTGA    |
| <i>TaNCED1</i>    | F             | CGACGGGTACATTCTCACCT    |
|                   | R             | CCTGAGATTCGAGCTCCTTG    |
| <i>TaABA8'OH2</i> | F             | TACAGGTGGGAGGTTGTTGG    |
|                   | R             | TCGTAGTCGTCATCAGTCGG    |
| <i>TaPP2C1</i>    | F             | GGTGATCGTCTCTTTGTCGC    |
|                   | R             | AGAGCTTGTCACCAAAAGCG    |
| <i>TaSnRK2.8</i>  | F             | CGGGGAGAAGATAGACGAGAATG |
|                   | R             | CTCAAAAAGCTCACCACCAGATG |
| <i>TabZIP60</i>   | F             | ACATGTTTGCTCCGATGGTG    |
|                   | R             | GACAGCGAGGACAAGTTGAG    |
| <i>TaAREB3</i>    | F             | CTCAAGGACACGAGCGATGCTG  |
|                   | R             | CATTCAGCGGCTGAGGGACAAAC |
| <i>TaMYB3</i>     | F             | CAGGTGTCGGTCTTTCTCGTTT  |
|                   | R             | GTGGTCAATGGCTCTGCTGTTA  |
| <i>TaERF3</i>     | F             | AGCAATCAGGCAAAGCAACC    |
|                   | R             | ACGACTCAGAAGGAACCACGAC  |
| <i>TaWRKY2</i>    | F             | CCAACCCCAGGAGCTACTAC    |
|                   | R             | GAGCTGTCCGAGGAAGATGA    |
